# Supplementary material for: Accelerating peroxidase mimicking nanozymes using DNA
Source: Royal Society of Chemistry journal article supplement (doi:10.1039/c5nr04176g), 2015-01-01
Supplement: c5nr04176g1.pdf [file c5nr04176g1.pdf]

## **Electronic Supplementary Information**

### **Accelerating peroxidase mimicking nanozymes using DNA**

Biwu Liu and Juewen Liu\*

Department of Chemistry, Waterloo Institute for Nanotechnology,

Waterloo, Ontario, Canada, N2L 3G1.

Email: [liujw@uwaterloo.ca](mailto:liujw@uwaterloo.ca)

## Materials and Methods

**Chemicals.** All of the DNA samples were from Integrated DNA Technologies (IDT, Coralville, IA, USA). Their sequences and modifications are shown in Table S1. Fe<sub>3</sub>O<sub>4</sub> NPs (637106), nanoceria (catalog number: 289744, 20% dispersed in 2.5% acetic acid), 3,3',5,5'-tetramethylbenzidine (TMB), 2,2'-azino-bis(3-ethylbenzothiazoline-6-sulfonic acid) diammonium salt (ABTS), 30 wt% H<sub>2</sub>O<sub>2</sub> solution, polystyrene sulfonate (PSS, catalog number: 527483), polyacrylic acid, sodium salt (PAA, catalog number: 416037), and guanosine monophosphate (GMP) were purchased from Sigma-Aldrich. Fe<sub>2</sub>O<sub>3</sub> NPs (Stock number: US3200) were purchased from US Research Nanomaterials (Houston, TX). Sodium acetate, sodium citrate, sodium phosphate, sodium chloride, 4-(2-hydroxyethyl) piperazine-1-ethanesulfonic acid (HEPES), 2-(N-morpholino) ethanesulfonic acid (MES) were from Mandel Scientific (Guelph, ON, Canada). Milli-Q water was used for all of the experiments.

**Table S1.** The sequences and modifications of DNA used in this work

| DNA names           | Sequences (from 5' to 3') and modifications |
|---------------------|---------------------------------------------|
| Alexa-DNA           | TCA CAG ATG CGT-Alexa Fluoro 488            |
| FAM-24 mer          | FAM-ACG CAT CTG TGA AGA GAA CCT GGG         |
| FAM-A <sub>5</sub>  | FAM-AAA AA                                  |
| FAM-A <sub>15</sub> | FAM-AAA AAA AAA AAA AAA                     |
| FAM-A <sub>30</sub> | FAM-AAA AAA AAA AAA AAA AAA AAA AAA AAA AAA |
| A <sub>5</sub>      | AAA AA                                      |
| C <sub>5</sub>      | CCC CC                                      |
| C <sub>10</sub>     | CCC CCC CCC C                               |
| A <sub>15</sub>     | AAA AAA AAA AAA AAA                         |
| T <sub>15</sub>     | TTT TTT TTT TTT TTT                         |
| C <sub>15</sub>     | CCC CCC CCC CCC CCC                         |
| G <sub>15</sub>     | GGG GGG GGG GGG GGG                         |
| C <sub>30</sub>     | CCC     |

**Modification of Iron Oxide NPs.** To coat Fe<sub>3</sub>O<sub>4</sub> NPs with polymers, PSS or PAA (final concentration 10 mg/mL) was mixed with 1 mg/mL of the NPs. After overnight stirring, the excess polymers were removed by centrifugation (10 000 rpm, 10 min) and the resulting conjugates were washed with Milli-Q water three times. PSS-modified Fe<sub>2</sub>O<sub>3</sub> NPs were prepared in a similar way. Phosphate (1 mM), GMP (1 mM), and DNA (G<sub>15</sub>, 500 nM) modified NPs were prepared by incubating them with designated concentrations of Fe<sub>3</sub>O<sub>4</sub> NPs and capping agents in acetate buffer (pH 4) for at least 10 min without further purification.

**Transmission Electron Microscopy (TEM) and UV-vis spectroscopy.** The particle size and morphology of Fe<sub>3</sub>O<sub>4</sub> NPs was studied using TEM (Philips CM10). The TEM sample was prepared by dropping Fe<sub>3</sub>O<sub>4</sub> NPs dispersion (50 µg/mL) into a copper grid and was allowed to dry overnight at room temperature. The UV-vis spectra of Fe<sub>3</sub>O<sub>4</sub> NPs, TMB and oxidized TMB were obtained after reacting H<sub>2</sub>O<sub>2</sub> (20 mM) with TMB (0.5 mM) at different conditions for 15 min using a UV-vis spectrometer (Agilent 8453A). C<sub>30</sub> DNA (500 nM) was used to modify Fe<sub>3</sub>O<sub>4</sub> NPs. The concentration of Fe<sub>3</sub>O<sub>4</sub> NPs was 50 µg/mL for most experiments unless otherwise specified. The visual images were taken by a digital camera.

**ζ-potential measurement** .The ζ-potential was measured by dynamic light scattering (DLS) using a Nanosizer ZS90 (Malvern). Effects of pH, buffer, and surface modification on the ζ-potential of Fe<sub>3</sub>O<sub>4</sub> NPs and Fe<sub>2</sub>O<sub>3</sub> NPs were tested and the reaction conditions were specified in Table S2. The temperature was maintained at 25 °C during the measurements.

**Inhibition of DNA adsorption.** To study the effect of H<sub>2</sub>O<sub>2</sub> and TMB on DNA adsorption kinetics, Alexa-DNA (50 nM) was dissolved in a pH 4 acetate buffer (10 mM) with varying concentrations of H<sub>2</sub>O<sub>2</sub> or TMB. The initial fluorescence of the free DNA (F<sub>0</sub>) was monitored for 3 min (excitation at 485 nm, emission at 535 nm) using a microplate reader (Infinite F200Pro, Tecan). After a quick addition of Fe<sub>3</sub>O<sub>4</sub> NP dispersion (final concentration 25 µg/mL), the fluorescence was monitored for another 30 min. The fluorescence was then normalized based on the initial intensity (F/F<sub>0</sub>).

**Peroxidase activity assays.** In a typical assay, 1 µL of TMB in DMSO solution (50 mM) was added into 100 µL of Fe<sub>3</sub>O<sub>4</sub> NPs (final concentration 50 µg/mL) with or without DNA at pH 4 (acetate buffer, 10 mM), followed by a quick mixing to avoid TMB precipitation. The absorbance at 652 nm was recorded in the kinetic mode using the microplate reader. Afterwards, H<sub>2</sub>O<sub>2</sub> (10 mM) was added to initiate the reaction and the absorbance was monitored for another 30 min. The effect of DNA sequence was studied using homo poly DNAs with different bases (A<sub>15</sub>, T<sub>15</sub>, C<sub>15</sub>, or G<sub>15</sub>, 500 nM each). Poly C DNAs (5, 10, 15, or 30 mer) were used to investigate the DNA length effect. The total concentration of nucleotides of cytosine was set at 3 µM. For the DNA concentration and pH effect studies, C<sub>30</sub> was used as the capping agent. The solution pH was controlled by using designated buffers (acetate buffer for pH 4 and 5, MES for pH 6, and HEPES for pH 7 and 8). The oxidation kinetics of ABTS at various salt concentrations were studied in a similar way except that the final concentration of ABTS was 1 mM. The absorbance at 420 nm was recorded. NaCl was used to adjust the ionic strength of the reaction.

**Activity of CeO<sub>2</sub> NPs.** DNA (A<sub>5</sub>, 5 μM) was incubated with CeO<sub>2</sub> NPs (0.1 mg/mL) for 15 min before adding TMB (1 mM). To study the DNA effect on the peroxidase activity of CeO<sub>2</sub>, a mixture of TMB and H<sub>2</sub>O<sub>2</sub> solution was added into CeO<sub>2</sub> or DNA-CeO<sub>2</sub>. The final concentration of H<sub>2</sub>O<sub>2</sub> was 10 mM. All the reactions were performed in a pH 4 acetate buffer (10 mM). The photographs were taken after 30 min reaction time.

**Gel electrophoresis.** The conjugate was prepared by mixing FAM-24 mer (200 nM) and Fe<sub>3</sub>O<sub>4</sub> NPs (25 μg/mL) in acetate buffer (pH 4.0, 10 mM) and 10 mM H<sub>2</sub>O<sub>2</sub> was added. As a control, 50 μM of Fe<sup>2+</sup> was used to cleave DNA at the same reaction condition. For denaturing gels, DNA-Fe<sub>3</sub>O<sub>4</sub> NPs in the absence or the presence of H<sub>2</sub>O<sub>2</sub> was loaded onto 15% polyacrylamide gel with 8 M urea. The gels were then imaged using blue LED epi excitation (Bio-Rad, Chemidoc MP).

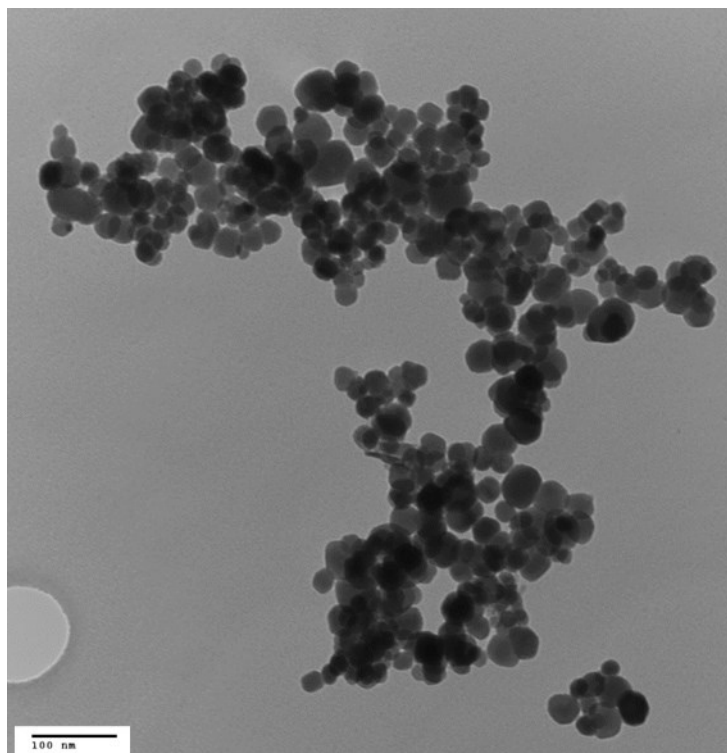

**Figure S1.** A TEM micrograph of  $\text{Fe}_3\text{O}_4$  NPs used in this work.

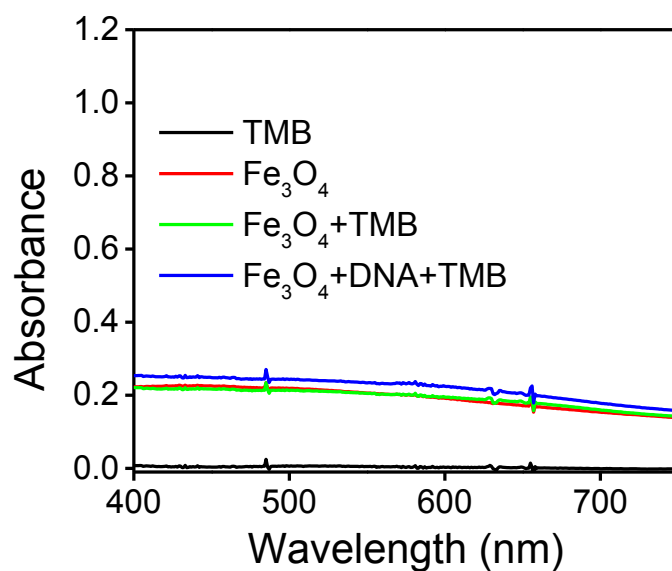

**Figure S2.** UV-vis absorbance spectra of non-oxidized TMB, Fe<sub>3</sub>O<sub>4</sub> NPs, Fe<sub>3</sub>O<sub>4</sub> NPs-TMB, Fe<sub>3</sub>O<sub>4</sub> NPs-DNA with TMB. The final concentration of TMB is 0.5 mM. DNA (C<sub>30</sub>, 500 nM) modified Fe<sub>3</sub>O<sub>4</sub> NPs (50 μg/mL) were prepared as mentioned above. The spectra were collected after adding H<sub>2</sub>O<sub>2</sub> (20 mM) for 15 min. Fe<sub>3</sub>O<sub>4</sub> NPs do not show any specific absorption peak in the visible range (400 nm-750 nm). Neither Fe<sub>3</sub>O<sub>4</sub> NPs nor DNA modified Fe<sub>3</sub>O<sub>4</sub> NPs cause TMB oxidation in the absence of H<sub>2</sub>O<sub>2</sub>.

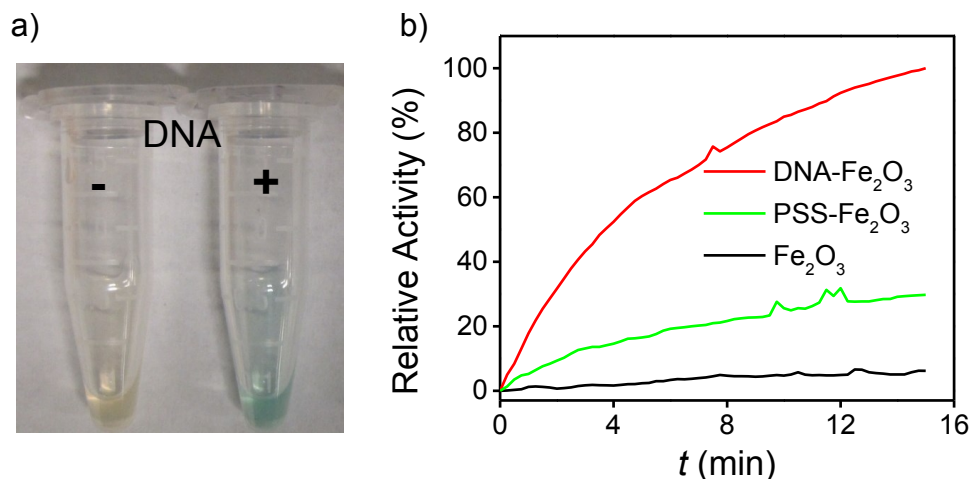

**Figure S3.** DNA enhanced peroxidase activity with Fe<sub>2</sub>O<sub>3</sub> NPs. (a) Photograph shows the colour change of TMB (0.5 mM) catalysed by (-) bare NPs without DNA and (+) DNA modified Fe<sub>2</sub>O<sub>3</sub> NPs. (b) Kinetic traces of TMB (0.5 mM) oxidation catalysed by bare Fe<sub>2</sub>O<sub>3</sub>, PSS modified Fe<sub>2</sub>O<sub>3</sub>, and DNA modified Fe<sub>2</sub>O<sub>3</sub>. The concentration of Fe<sub>2</sub>O<sub>3</sub> NPs is 50 µg/mL and that of DNA (C<sub>30</sub>) is 500 nM. The highest absorbance at 15 min is set as 100% activity. PSS-Fe<sub>2</sub>O<sub>3</sub> conjugates were prepared by incubating PSS (1 wt %) with Fe<sub>2</sub>O<sub>3</sub> NPs for overnight, followed by centrifugation, and washing three times. Finally, the conjugates were dispersed in Milli-Q water. All reactions were performed in pH 4 buffer (acetate, 10 mM).



**Table S2.**  $\zeta$ -potential of iron oxides at various conditions: pH, buffer, surface, and substrate.

| <b>pH</b> | <b>Nanoparticles</b>           | <b>Buffer</b> | <b>Surface Modification</b> | <b>Substrate</b> | <b><math>\zeta</math>-potential (mV)</b> |
|-----------|--------------------------------|---------------|-----------------------------|------------------|------------------------------------------|
| 4.0       | Fe <sub>3</sub> O <sub>4</sub> | Acetate       | No                          | No               | 12.91 ± 3.66                             |
| 4.0       | Fe <sub>3</sub> O <sub>4</sub> | Acetate       | No                          | TMB              | 28.70 ± 0.98                             |
| 4.0       | Fe <sub>3</sub> O <sub>4</sub> | Acetate       | DNA                         | No               | -36.68 ± 1.71                            |
| 4.0       | Fe <sub>3</sub> O <sub>4</sub> | Acetate       | DNA                         | TMB              | -25.30 ± 0.14                            |
| 4.0       | Fe <sub>3</sub> O <sub>4</sub> | Acetate       | PAA                         | No               | -34.80 ± 1.17                            |
| 4.0       | Fe <sub>3</sub> O <sub>4</sub> | Acetate       | PSS                         | No               | -34.80 ± 1.28                            |
| 4.0       | Fe <sub>3</sub> O <sub>4</sub> | Phosphate     | No                          | No               | -20.37 ± 0.23                            |
| 7.6       | Fe <sub>3</sub> O <sub>4</sub> | HEPES         | No                          | No               | -27.40 ± 0.61                            |
| 7.6       | Fe <sub>3</sub> O <sub>4</sub> | Phosphate     | No                          | No               | -47.60 ± 1.15                            |
| 4.0       | Fe <sub>2</sub> O <sub>3</sub> | Acetate       | No                          | No               | 12.33 ± 0.67                             |
| 4.0       | Fe <sub>2</sub> O <sub>3</sub> | Acetate       | DNA                         | No               | -34.17 ± 0.51                            |

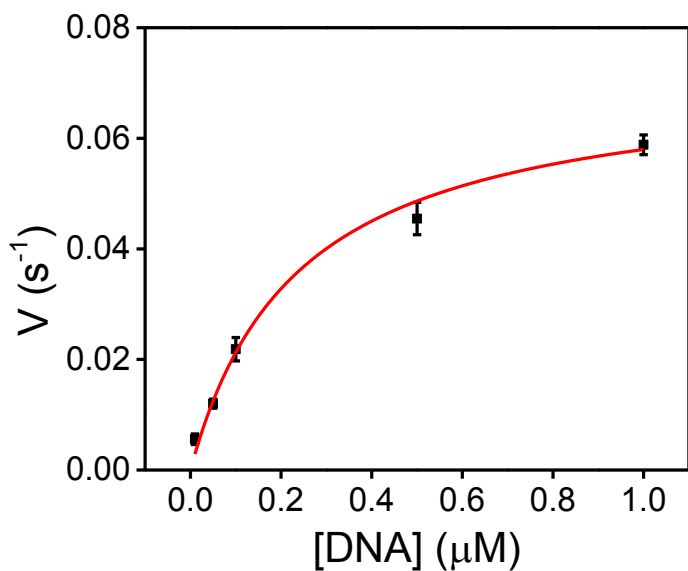

**Figure S4.** DNA concentration dependent acceleration of TMB oxidation.  $V$  is the initial reaction velocity. The error bars represent three measurements.  $\text{Fe}_3\text{O}_4$  NPs were incubated with different concentrations of  $\text{C}_{30}$  (10, 50, 100, 500, 1000 nM) at pH 4 acetate buffer for 10 min, followed by adding TMB (0.5 mM) and  $\text{H}_2\text{O}_2$  (10 mM). The initial reaction velocity is fitted to the equation:  $V = \frac{V_{\max} * [\text{DNA}]}{K + [\text{DNA}]}$ .  $V_{\max}$  is saturated at  $0.072 \text{ s}^{-1}$ , indicating DNA adsorption reached saturation as well.

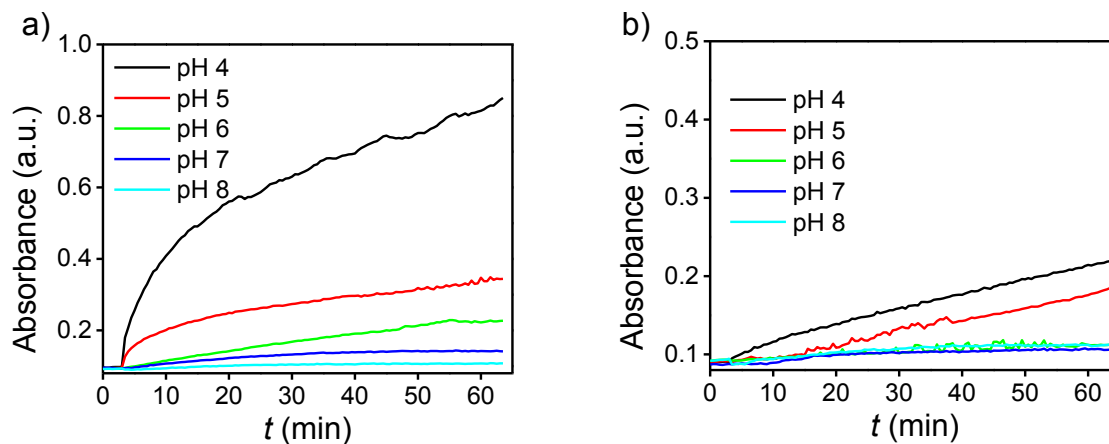

**Figure S5.** Kinetics of TMB oxidation catalyzed by (a) DNA-Fe<sub>3</sub>O<sub>4</sub> NPs and (b) bare Fe<sub>3</sub>O<sub>4</sub> NPs at various pH values. Fe<sub>3</sub>O<sub>4</sub> NPs (50  $\mu$ g/mL) were incubated with DNA (C<sub>30</sub>, 500 nM) at different buffers (acetate buffer for pH 4 and 5, MES for pH 6, and HEPES for pH 7 and 8, 10 mM for all buffers) for 10 min. TMB (0.5 mM) and H<sub>2</sub>O<sub>2</sub> (10 mM) were then subsequently added and the absorbance at 652 nm was monitored for another 60 min.

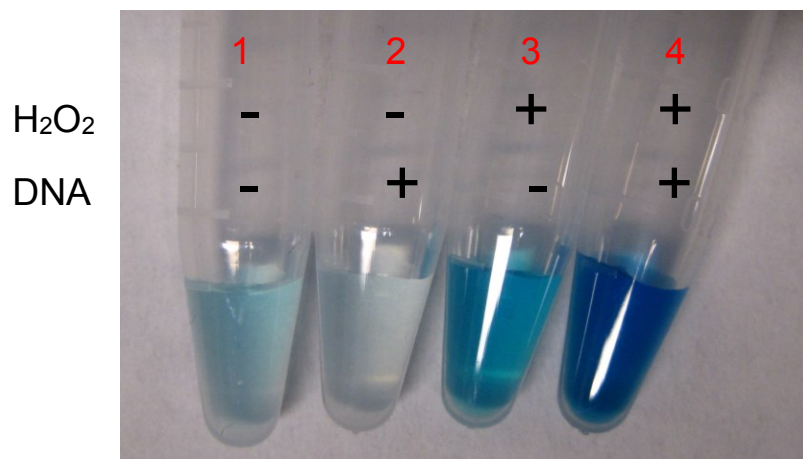

**Figure S6.** Effect of DNA on the (tubes 1 and 2) oxidase and (tubes 3 and 4) peroxidase activity of CeO<sub>2</sub> NPs. The concentration of CeO<sub>2</sub> is 0.1 mg/mL and that of TMB is 1 mM. H<sub>2</sub>O<sub>2</sub> (10 mM) was added in tube 3 and 4 to mimic the peroxidase activity. The image was taken after 30 min reaction by digital camera. The addition of A<sub>5</sub> DNA (5 μM) inhibits TMB oxidation in the absence of H<sub>2</sub>O<sub>2</sub>, indicated by the weaker color of tube 2 compared to tube 1. This inhibition is consistent with our previous report.<sup>S1</sup> Interestingly, DNA can enhance TMB oxidation in the presence of H<sub>2</sub>O<sub>2</sub>, suggested by the stronger blue color of tube 4 compared to tube 3. Taken together, DNA can decrease the oxidase activity and increase the peroxidase activity of CeO<sub>2</sub>.

#### **Additional references**

S1. Pautler, R.; Kelly, E. Y.; Huang, P.-J. J.; Cao, J.; Liu, B.; Liu, J., Attaching DNA to Nanoceria: Regulating Oxidase Activity and Fluorescence Quenching. *ACS Appl. Mater. Interfaces* **2013**, 5 (15), 6820-6825.
